# Supplementary material for: Direct ink writing of high explosive composites containing metal–organic frameworks
Source: Royal Society of Chemistry journal article supplement (doi:10.1039/d4ra03241a), 2024-01-01
Supplement: d4ra03241a1.pdf [file d4ra03241a1.pdf]

## Direct Ink Writing of High Explosive Composites Containing Metal–Organic Frameworks

Eun-Young Kim<sup>a,b</sup>, Seong han Kim<sup>c</sup>, Mingu Han<sup>c,\*</sup>, and Su-Young Moon<sup>a,\*</sup>

<sup>a</sup>Hydrogen & C1 Gas Research Center, Chemical & Process Technology, Korea Research Institute of Chemical Technology, Daejeon 34114, Korea.

<sup>b</sup>Department of Chemical and Biomolecular Engineering, Yonsei University, 50 Yonsei-ro, Seodaemun-gu, Seoul 03722, Korea.

<sup>c</sup>4<sup>th</sup> R&D Institute 2<sup>nd</sup> directorate Agency for Defense Development, Yuseong, P O Box 35-42, Daejeon 34186, Korea.

E-mail addresses: [mingu@add.re.kr](mailto:mingu@add.re.kr) (MGH), [msy1609@kriict.re.kr](mailto:msy1609@kriict.re.kr) (S-YM)

**KEYWORDS** Direct ink writing (DIW), 1,3,5-trinitro-1,3,5-triazinane (RDX), metal–organic frameworks (MOFs), explosion

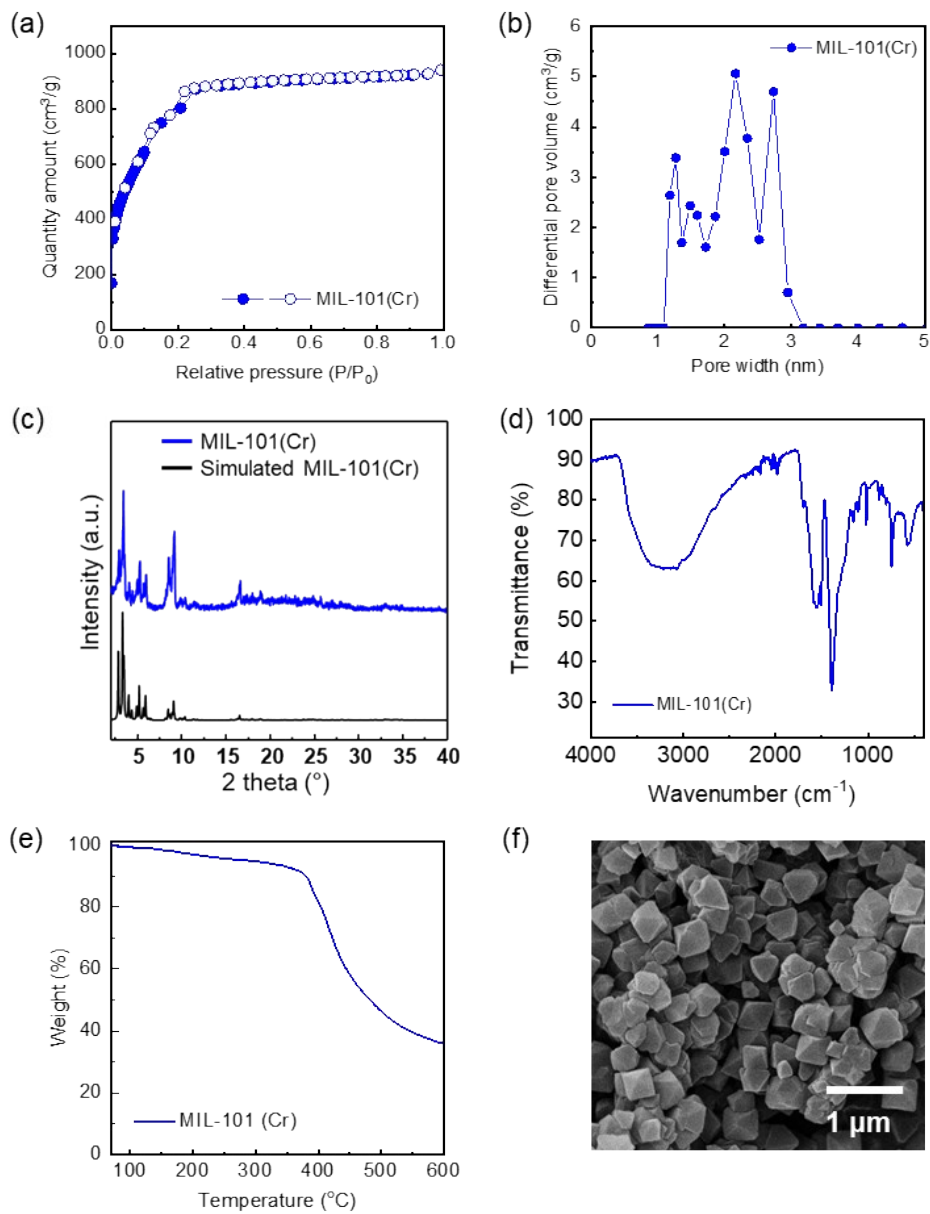

**Fig. S1** (a)  $N_2$  isotherm, (b) pore size distribution, (c) XRD peak, (d) IR spectrum, (e) TGA data, and (f) FESEM image of MIL-101(Cr)



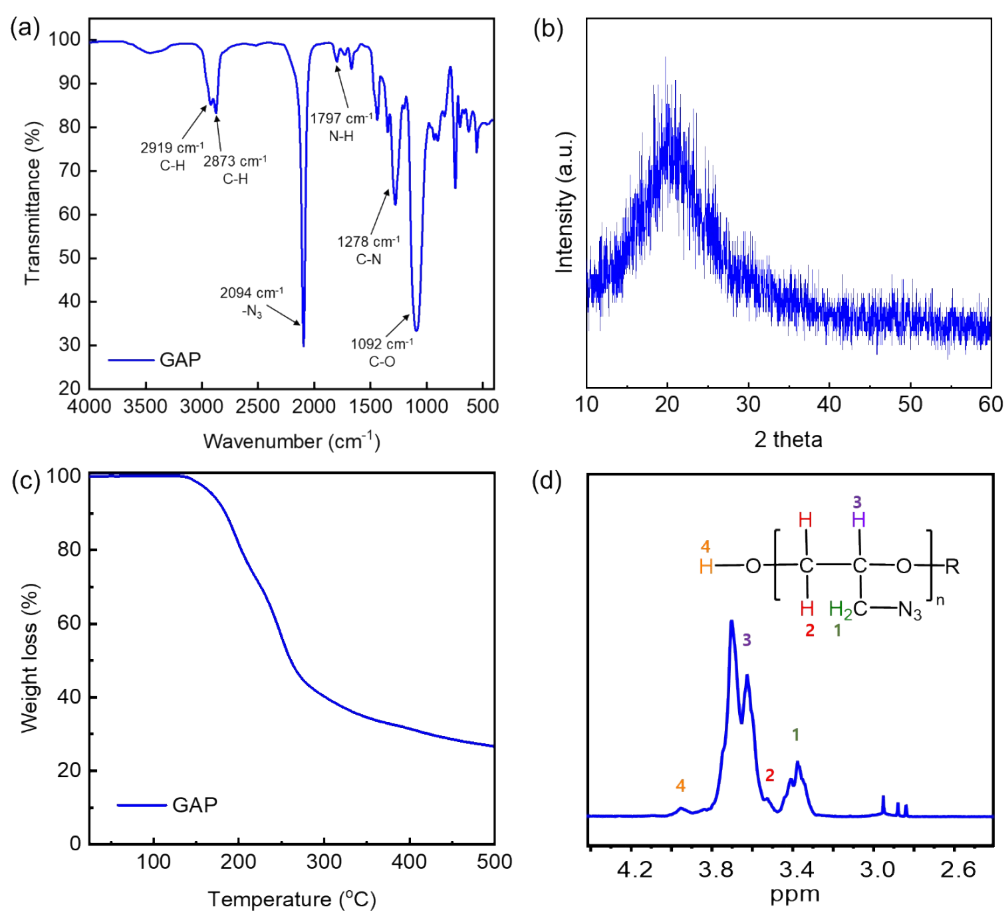

**Fig. S3** (a) IR spectrum, (b) XRD pattern, (c) TGA data, and (d) NMR peak of GAP

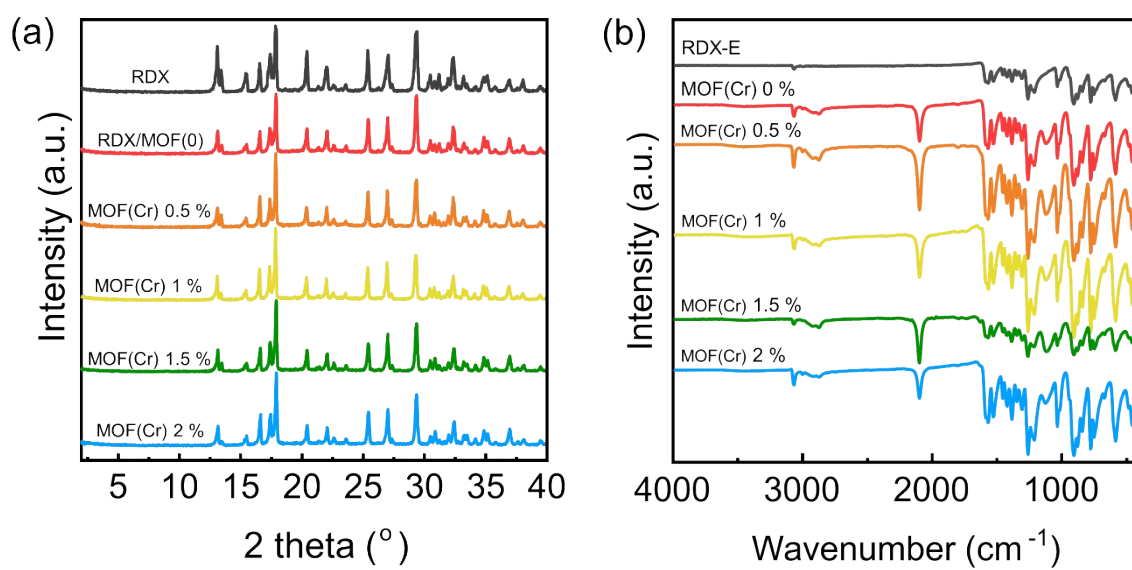

**Fig. S4** (a) PXRD peaks and (b) IR spectra of RDX-based ink

**Table S1.** The viscosity of RDX/MOF composites

| Sample            | RDX/MOF(0) | RDX/MOF(0.5) | RDX/MOF(1) | RDX/MOF(1.5) | RDX/MOF(2) |
|-------------------|------------|--------------|------------|--------------|------------|
| Viscosity<br>[cp] | 2.3        | 2.6          | 3.0        | 3.3          | 4.0        |
